# Supplementary material for: Sulfation affects apical extracellular matrix organization during development of the Drosophila embryonic salivary gland tube
Source: eLife. 2025 Sep 23;14:RP108292. doi: 10.7554/eLife.108292 (PMC12456955; doi:10.7554/eLife.108292)
Supplement: Figure 1—figure supplement 3—source data 1. — See Figure 1—figure supplement 3 for graphs. [file elife-108292-fig1-figsupp3-data1.xlsx]

## Sheet: Sheet1
Whole embryo morphology (percentage)				Whole embryo morphology st 14				Whole embryo morphology st 15				Whole embryo morphology st 16
	No defects	Whole embryonic defects			No defects	Whole embryonic defects			No defects	Whole embryonic defects			No defects	Whole embryonic defects
OR (n=202)	99.51	0.49		OR (n=35)	97.14	2.86		OR (n=36)	100	0		OR (n=34)	100	0
Papss2 (n=204)	60.78	39.22		Papss2 (n=38)	31.58	68.42		Papss2 (n=27)	88.89	11.11		Papss2 (n=45)	88.89	11.11
Papss2/Df (n=136)	90.44	9.56		Papss2/Df (n=34)	97.06	2.94		Papss2/Df (n=39)	100	0		Papss2/Df (n=26)	100	0
Papss2/+ (n=250)	100	0		Papss2/+ (n=50)	100	0		Papss2/+ (n=44)	100	0		Papss2/+ (n=40)	100	0
SG Poaitioning st 11-15 (percentage)				SG positioning st 14				SG positioning st 15				SG Positioning at st 16
	Normal positioning	Mispositioning			Normal positioning	Mispositioning			Normal positioning	Mispositioning			Normal positioning	Mispositioning
OR (n=164)	98.78	1.22		OR (n=35)	100	0		OR (n=36)	97.22	2.78		OR (n=34)	100	0
Papss2 (n=180)	50.56	49.44		Papss2 (n=38)	50	50		Papss2 (n=27)	85.19	14.81		Papss2 (n=45)	91.11	8.89
Papss2/Df (n=128)	86.72	13.28		Papss2/Df (n=34)	97.06	2.94		Papss2/Df (n=39)	91.67	8.33		Papss2/Df (n=26)	88.46	11.54
Papss2/+ (n=212)	99.05	0.95		Papss2/+ (n=40)	99	1		Papss2/+ (n=44)	100	100		Papss2/+ (n=49)	100	0
