# Supplementary material for: Sulfation affects apical extracellular matrix organization during development of the Drosophila embryonic salivary gland tube
Source: eLife. 2025 Sep 23;14:RP108292. doi: 10.7554/eLife.108292 (PMC12456955; doi:10.7554/eLife.108292)
Supplement: Figure 1—source data 1. — See Figure 1J-L for the graphs. [file elife-108292-fig1-data1.xlsx]

## Sheet: Sheet1
Lumen Phenotype st 14 (percentage)					Lumen Phenotype st 16 (percentage)
	Thin	Irregular lumen	Normal expansion			Thin	Irregular Expansion	Full Expansion	Over Expansion
WT	0	0	100		WT	10	5	85	0
Papss2	18	24	58		Papss2	51	49	0	0
Papss2/Df	28	4	68		Papss2/Df	40.74	55.56	3.7	0
					sage>Papss-PE; Papss2	4	31	42	23
					sage>Papss-PE	0	0	98	2
					sage > Papss-PD K193A,F593P; Papss2	53.58	46.42	0	0
