# Supplementary material for: Sulfation affects apical extracellular matrix organization during development of the Drosophila embryonic salivary gland tube
Source: eLife. 2025 Sep 23;14:RP108292. doi: 10.7554/eLife.108292 (PMC12456955; doi:10.7554/eLife.108292)
Supplement: Figure 1—source data 2. — See Figure 1J-L for the graphs. [file elife-108292-fig1-data2.xlsx]

## Sheet: Sheet1
Lumen Length													Average lumen diameter per sample
OR	Papss2 (thin)	Papss2 (irreg. exp.)	Papss2/Df (Thin)	Papss2/Df (irreg. exp.)	Sage>Papss-PE (norm. exp.)	sage>Papss-PE; Papss2 (norm. exp.)	sage>Papss-PD; Papss2 (norm. exp.)	sage>Papss-PDK193A F593P; Papss2 (thin)	sage>PapssRD K193A F593P; Papss2 (irreg.exp.)
69.89	75.753	76.959	66.1	86.41	81.49	83.67	85.3	65.5	95.21				OR	Papss2 (thin)	Papss2 (irreg. exp.)	Papss2/Df (Thin)	Papss2/Df (irreg. exp.)	Sage>Papss-PE (norm. exp.)	sage>Papss-PE; Papss2 (norm. exp.)	sage>Papss-PD; Papss2 (norm. exp.)	sage>Papss-PDK193A F593P; Papss2 (thin)	sage>PapssRD K193A F593P; Papss2 (irreg.exp.)
85.693	70.234	62.574	59.36	67.6	89.3	89.86	88.3	98	74.74				7.04075	5	11.4765	3.3675	6.015	8.865	6.69	7.8925	3.67	7.1975
72.777	83.457	59.974	57.83	72.7	70.97	75.77	90.5	68.06	61.53				6.9525	4.6605	7.016	2.5325	5.475	6.555	6.1025	8.2	2.465	3.8325
77.391	59.153	68.904	66.89	80.5	65.2	65.56	88.94	67.86	66.41				8.26475	4.7975	6.1505	2.625	4.19	5.7925	6.165	8.6075	3.4375	6.4425
81.707	74.612	95.107	67.75	68.9	65.83	62.09	85.81	65.83	74.73				6.581	3.91375	8.04275	2.44	4.8975	5.1375	6.23	7.81825	2.55	7.2675
69.12	65.074	83.087	64.49	65.01	66.74	82.12	91.5	66.24	92.88				7.11125	4.63125	6.11725	2.365	4.9125	5.8275	8.3075	6.0525	3.25	5.45
83.079	85.28	64.131	93.04	64.5	63.6	77.8	78.66	67.06	77.42				8.817	3.508	7.72325	2.255	5.2725	5.8175	7.385	5.2125	2.8	7.8175
71.982	79.519	69.587	91.64	79.5	79.13	69.5	79.5	70.3					10.4268	4.1305	8.43425	2.205	4.2375	5.7725	6.8	6.8325	2.325	9.00925
		70.819			86.4		85.5	71.2					7.37925	4.31875	5.15525	1.9175	5.035	6.63	6.485	6.7775	1.9425
		61.006			75.3		72.22	68.44							5.94975			6.2025		5.85	2.635
								76.3										6.0675		4.78	2.6
																					3.525
Lumen Area													Coefficient of Variation
WT	Papss (thin)	Papss2 (irreg. exp.)	Papss2/Df (Thin)	Papss2/Df (irreg. exp.)	sage>Papss-PE (norm exp.)	sage>Papss-PE; Papss2 (norm. exp.)	sage>Papss-PD; Papss2 (norm. exp.)	sage>PapssPDK193A F593P; Papss2 (thin)	sage>PapssRD K193A F593P; Papss2 (irreg. exp.)				OR	Papss2 (thin)	Papss2 (irreg. exp.)	Papss2/Df (Thin)	Papss2/Df (irreg. exp.)	Sage>Papss-PE (norm. exp.)	sage>Papss-PE; Papss2 (norm. exp.)	sage>Papss-PD; Papss2 (norm. exp.)	sage>Papss-PDK193A F593P; Papss2 (thin)	sage>PapssRD K193A F593P; Papss2 (irreg.exp.)
448.807	286.482	453.053	260.609	530.956	330.698	551.896	692.83	263	613.2				8.97653	31.0123	47.94	40.3645	59.9693	16.9126	34.9405	23.5802	38.5428	52.8692
478.2	402.018	454.931	250.572	371.549	382.743	498.831	793.6	255.97	341.67				10.5767	42.7499	39.5565	28.3835	59.9292	32.9862	19.6036	27.3599	23.7787	68.4647
532.773	169.971	366.045	189.13	339.269	360.525	421.726	819.4	275.84	411.19				8.88388	39.0276	47.471	17.3866	50.7813	10.0014	13.1414	10.7853	57.8338	80.4507
455.515	361.364	400.07	211.385	448.417	401.206	388.289	661.609	216.16	591.68				8.87874	25.6976	65.4571	25.9311	46.0424	1.17193	16.7135	30.3415	22.5277	66.272
529.471	188.937	570.385	269.29	412.829	408.384	503.559	635.5	199.441	408.67				5.49977	26.1278	93.053	26.6564	76.1792	7.78262	43.0056	41.9417	35.217	37.8563
480.993	234.494	292.155	234.388	419.715	436.649	525.877	491.42	194.32	592.034				6.88702	24.8508	72.0849	17.924	34.5782	12.5137	26.6988	58.4339	58.5395	34.2171
390.757	284.657	448.202	291.52	270.131	763.927	608.012	649.72	221.1	632.18				7.34914	23.2154	48.7801	18.5239	57.5206	24.6787	15.5632	41.3306	46.5067	80.5389
359.592	322.047	414.053	254.374	336.582	684.703	518.427	564.65	250.11					7.6147	20.099	57.8485	42.5842	38.8144	12.5458	12.5037	22.3994	18.4294
391.286	249.78	328.22			385.918		601.5	271.3							53.3774			13.3011		15.0647	37.4162
472.234	252.654	392.139			361.263		489.9	194.52							48.5181			29.5964		25.4073	53.5707
398.639	263.436	405.384						272.3													42.5453
445.921	265.147	306.759
365.539	193.925	312.512
365.765
368.507
512.226
