# Supplementary material for: Sulfation affects apical extracellular matrix organization during development of the Drosophila embryonic salivary gland tube
Source: eLife. 2025 Sep 23;14:RP108292. doi: 10.7554/eLife.108292 (PMC12456955; doi:10.7554/eLife.108292)
Supplement: Figure 2—source data 1. — See Figure 2D for the graph. [file elife-108292-fig2-data1.xlsx]

## Sheet: Sheet1
OR (0508025)
		Outer					Inner
		area	mean gray value	integrated density			area	mean gray value (medial region)	integrated density		SAR area	integrated density for SAR	mean gray value (SAR region)		Background mean gray value	avg.		Background subtacted SAR MGV	Background subtracted medial MGV	ratio mean gray value (SAR/medial)	Avg.
Series001	Cell1	6230	14.141	88097			3023	12.845	38831		3207	49266	15.362		0.815	0.8908		14.4712	11.9542	1.21056	1.51996
	Cell2	7103	15.207	108016			3459	11.448	39598		3644	68418	18.7755		1.754			17.8847	10.5572	1.69408
	Cell3	7039	14.44	101642			3214	10.804	34724		3825	66918	17.4949		1.086			16.6041	9.9132	1.67495
	Cell4	6755	13.959	94292			3021	11.128	33617		3734	60675	16.2493		0.387			15.3585	10.2372	1.50027
															0.412
Series002	Cell1	2985	19.853	59261			1164	13.314	15498		1821	43763	24.0324		0.235	0.1916		23.8408	13.1224	1.8168	1.50707
	Cell2	3300	20.997	69291			1432	16.309	23354		1868	45937	24.5915		0.198			24.3999	16.1174	1.51389
	Cell3	3173	19.552	62040			1372	16.715	22933		1801	39107	21.714		0.181			21.5224	16.5234	1.30254
	Cell4	3944	17.2	67837			1836	14.235	26135		2108	41702	19.7827		0.26			19.5911	14.0434	1.39504
															0.084
Series003	Cell1	4672	18.341	85688			2063	15.408	31787		2609	53901	20.6596		0.279	0.217		20.4426	15.191	1.34571	1.56597
	Cell2	5765	16.609	95751			2429	13.5	32791		3336	62960	18.8729		0.208			18.6559	13.283	1.40449
	Cell3	4191	20.213	84711			1664	16.922	28158		2527	56553	22.3795		0.186			22.1625	16.705	1.3267
	Cell4	3522	25.119	88468			1053	16.658	17541		2469	70927	28.727		0.239			28.51	16.441	1.73408
	Cell5	4263	20.515	87455			1867	14.876	27774		2396	59681	24.9086		0.173			24.6916	14.659	1.6844
	Cell6	4056	19.051	77272			1744	13.209	23036		2312	54236	23.4585					23.2415	12.992	1.78891
	Cell7	3846	16.139	62069			1388	10.239	14212		2458	47857	19.4699					19.2529	10.022	1.92106
	Cell8	4375	19.702	86195			1667	16.46	27438		2708	58757	21.6976					21.4806	16.243	1.32245
Series004	Cell1	4537	20.84	94551			1308	16.31	21333		3229	73218	22.6751		0.141	0.9486		21.7265	15.3614	1.41436	1.64132
	Cell2	4991	20.423	101931			2053	15.646	32122		2938	69809	23.7607		0.607			22.8121	14.6974	1.55212
	Cell3	3695	22.225	82121			1491	17.605	26249		2204	55872	25.3503		1.548			24.4017	16.6564	1.465
	Cell4	4711	27.13	127810			1774	17.976	31890		2937	95920	32.6592		1.097			31.7106	17.0274	1.86233
	Cell5	4733	25.131	118944			1894	19.526	36982		2839	81962	28.87		1.35			27.9214	18.5774	1.50298
	Cell6	3833	24.945	95615			1559	16.992	26490		2274	69125	30.398					29.4494	16.0434	1.83561
	Cell7	4099	26.043	106749			1736	19.444	33754		2363	72995	30.8908					29.9422	18.4954	1.6189
	Cell8	4450	25.689	114316			1578	16.732	26403		2872	87913	30.6104					29.6618	15.7834	1.8793
Series005	Cell1	4242	18.049	76565			1287	14.77	19009		2955	57556	19.4775		0.305	0.402		19.0755	14.368	1.32764	1.38348
	Cell2	4385	15.631	68541			1582	12.838	20309		2803	48232	17.2073		0.408			16.8053	12.436	1.35134
	Cell3	3024	16.893	51085			1175	14.19	16673		1849	34412	18.6111		0.572			18.2091	13.788	1.32065
	Cell4	3631	14.996	54451			1507	12.073	18194		2124	36257	17.0702		0.426			16.6682	11.671	1.42817
	Cell5	3445	16.552	57021			1477	13.149	19421		1968	37600	19.1057		0.299			18.7037	12.747	1.4673
	Cell6	2998	16.922	50731			1088	13.528	14719		1910	36012	18.8545					18.4525	13.126	1.40579
Series006	Cell1	4934	14.164	69887			2100	11.543	24241		2834	45646	16.1066		0.29	0.407		15.6996	11.136	1.4098	1.4688
	Cell2	5036	15.719	79162			2400	12.515	30036		2636	49126	18.6366		0.433			18.2296	12.108	1.50558
	Cell3	6348	14.019	88993			3166	11.381	36031		3182	52962	16.6442		0.592			16.2372	10.974	1.47961
	Cell4	6292	13.804	86856			3331	11.091	36945		2961	49911	16.8561		0.525			16.4491	10.684	1.5396
	Cell5	5799	15.471	89715			2773	12.914	35811		3026	53904	17.8136		0.195			17.4066	12.507	1.39175
	Cell6	6066	14.602	88576			3079	11.624	35791		2987	52785	17.6716					17.2646	11.217	1.53914
	Cell7	6371	16.359	104226			3347	13.175	44096		3024	60130	19.8843					19.4773	12.768	1.52547
	Cell8	4495	19.125	85966			1853	15.86	29389		2642	56577	21.4145					21.0075	15.453	1.35944
Series007	Cell1	5750	22.655	130269			2553	16.87	43069		3197	87200	27.2756		1.15	1.778		25.4976	15.092	1.68948	1.47453
	Cell2	4335	24.391	105737			1999	19.127	38235		2336	67502	28.8964		1.586			27.1184	17.349	1.56311
	Cell3	4424	20.527	90811			2060	16.601	34198		2364	56613	23.948		1.444			22.17	14.823	1.49565
	Cell4	4375	21.174	92637			2228	18.029	40168		2147	52469	24.4383		2.441			22.6603	16.251	1.39439
	Cell5	4283	21.486	92026			2316	17.937	41543		1967	50483	25.665		2.269			23.887	16.159	1.47825
	Cell6	5488	19.86	108993			2444	17.068	41715		3044	67278	22.1018					20.3238	15.29	1.32922
	Cell7	4439	21.044	93414			1750	17.504	30632		2689	62782	23.3477					21.5697	15.726	1.3716
Papss2 (0508025)
		Outer					Inner
		area	mean gray value	integrated density			area	mean gray value (medial region)	integrated density		SAR area	integrated density for SAR	mean gray value (SAR region)		Background mean gray value	avg.		Background subtacted SAR MGV	Background subtracted medial MGV	ratio mean gray value (SAR/medial)	Avg.
Series001	Cell1	12537	9.28	116344			5648	7.949	44898		6889	71446	10.371		0.025	0.0578		10.3132	7.8912	1.30693	1.28609
	Cell2	10865	6.801	73895			5710	5.575	31833		5155	42062	8.15946		0.02			8.10166	5.5172	1.46844
	Cell3	11258	8.13	91533			5992	6.524	39090		5266	52443	9.95879		0.124			9.90099	6.4662	1.53119
	Cell4	13701	8.453	115809			6394	8.105	51826		7307	63983	8.7564		0.074			8.6986	8.0472	1.08095
	Cell5	8002	12.522	100199			3270	12.213	39938		4732	60261	12.7348		0.046			12.677	12.1552	1.04293
Series002	Cell1	7750	9.727	75387			2796	8.465	23669		4954	51718	10.4396		0.093	0.0888		10.3508	8.3762	1.23574	1.16056
	Cell2	6494	7.653	49699			2381	7.158	17043		4113	32656	7.9397		0.084			7.8509	7.0692	1.11058
	Cell3	2876	14.976	43070			935	13.81	12912		1941	30158	15.5374		0.075			15.4486	13.7212	1.12589
	Cell4	2131	15.896	33874			569	14.144	8048		1562	25826	16.5339		0.097			16.4451	14.0552	1.17004
															0.095
Series003	Cell1	12252	7.231	88596			5850	6.893	40326		6402	48270	7.53983		0.212	0.3534		7.18643	6.5396	1.09891	1.14461
	Cell2	8618	7.109	61269			3274	6.185	20250		5344	41019	7.67571		0.283			7.32231	5.8316	1.25563
	Cell3	13890	8.381	116418			6901	7.775	53656		6989	62762	8.98011		0.396			8.62671	7.4216	1.16238
	Cell4	9606	7.904	75926			4238	7.26	30766		5368	45160	8.41282		0.441			8.05942	6.9066	1.16692
	Cell5	10956	7.081	77576			4592	6.931	31826		6364	45750	7.18887		0.435			6.83547	6.5776	1.03921
Series004	Cell1	8281	15.393	127467			4369	13.85	60511		3912	66956	17.1155		0.509	0.6314		16.4841	13.2186	1.24704	1.25776
	Cell2	9703	15.226	147736			5290	13.526	71555		4413	76181	17.2629		0.618			16.6315	12.8946	1.2898
	Cell3	8548	15.785	134933			3821	13.908	53143		4727	81790	17.3027		0.589			16.6713	13.2766	1.25569
	Cell4	10124	16.788	169960			5367	15.821	84913		4757	85047	17.8783		0.789			17.2469	15.1896	1.13544
	Cell5	5900	11.59	68383			2635	10.902	28726		3265	39657	12.1461		0.652			11.5147	10.2706	1.12113
	Cell6	7716	10.392	80184			3126	9.331	29169		4590	51015	11.1144					10.483	8.6996	1.205
	Cell7	6684	10.27	68648			2771	7.922	21952		3913	46696	11.9336					11.3022	7.2906	1.55024
Series005	Cell1	7813	32.293	252309			4425	28.855	127685		3388	124624	36.7839		1.378	1.4172		35.3667	27.4378	1.28898	1.38287
	Cell2	6267	31.547	197708			3317	27.335	90669		2950	107039	36.2844		1.183			34.8672	25.9178	1.3453
	Cell3	4856	27.08	131501			2738	22.323	61121		2118	70380	33.2295		1.123			31.8123	20.9058	1.5217
	Cell4	3242	32.07	103971			1582	28.436	44985		1660	58986	35.5337		1.451			34.1165	27.0188	1.2627
	Cell5	5002	30.942	154770			2621	24.936	65358		2381	89412	37.5523		1.951			36.1351	23.5188	1.53643
	Cell6	3342	36.348	121475			1271	30.238	38432		2071	83043	40.098					38.6808	28.8208	1.34211
Series006	Cell1	3282	13.754	45139			1345	13.352	17959		1937	27180	14.032		0.252	0.3502		13.6818	13.0018	1.0523	1.16206
	Cell2	3285	10.967	36028			1578	9.737	15365		1707	20663	12.1049		0.337			11.7547	9.3868	1.25225
	Cell3	4243	12.305	52208			2096	11.714	24553		2147	27655	12.8808		0.375			12.5306	11.3638	1.10267
	Cell4	6458	13.29	85827			3111	11.853	36876		3347	48951	14.6253		0.458			14.2751	11.5028	1.24101
															0.329

## Sheet: Ratio only_values
OR (0508025)					Papss2 (0508025)
		ratio mean gray value (SAR/medial)	Avg.				ratio mean gray value (SAR/medial)	Avg.
Series001	Cell1	1.21056	1.51996		Series001	Cell1	1.30693	1.28609
	Cell2	1.69408				Cell2	1.46844
	Cell3	1.67495				Cell3	1.53119
	Cell4	1.50027				Cell4	1.08095
						Cell5	1.04293
Series002	Cell1	1.8168	1.50707		Series002	Cell1	1.23574	1.16056
	Cell2	1.51389				Cell2	1.11058
	Cell3	1.30254				Cell3	1.12589
	Cell4	1.39504				Cell4	1.17004
Series003	Cell1	1.34571	1.56597		Series003	Cell1	1.09891	1.14461
	Cell2	1.40449				Cell2	1.25563
	Cell3	1.3267				Cell3	1.16238
	Cell4	1.73408				Cell4	1.16692
	Cell5	1.6844				Cell5	1.03921
	Cell6	1.78891
	Cell7	1.92106			Series004	Cell1	1.24704	1.25776
	Cell8	1.32245				Cell2	1.2898
						Cell3	1.25569
Series004	Cell1	1.41436	1.64132			Cell4	1.13544
	Cell2	1.55212				Cell5	1.12113
	Cell3	1.465				Cell6	1.205
	Cell4	1.86233				Cell7	1.55024
	Cell5	1.50298
	Cell6	1.83561			Series005	Cell1	1.28898	1.38287
	Cell7	1.6189				Cell2	1.3453
	Cell8	1.8793				Cell3	1.5217
						Cell4	1.2627
Series005	Cell1	1.32764	1.38348			Cell5	1.53643
	Cell2	1.35134				Cell6	1.34211
	Cell3	1.32065
	Cell4	1.42817			Series006	Cell1	1.0523	1.16206
	Cell5	1.4673				Cell2	1.25225
	Cell6	1.40579				Cell3	1.10267
						Cell4	1.24101
Series006	Cell1	1.4098	1.4688
	Cell2	1.50558
	Cell3	1.47961
	Cell4	1.5396
	Cell5	1.39175
	Cell6	1.53914
	Cell7	1.52547
	Cell8	1.35944
Series007	Cell1	1.68948	1.47453
	Cell2	1.56311
	Cell3	1.49565
	Cell4	1.39439
	Cell5	1.47825
	Cell6	1.32922
	Cell7	1.3716
