# Supplementary material for: Sulfation affects apical extracellular matrix organization during development of the Drosophila embryonic salivary gland tube
Source: eLife. 2025 Sep 23;14:RP108292. doi: 10.7554/eLife.108292 (PMC12456955; doi:10.7554/eLife.108292)
Supplement: Figure 3—source data 1. — See Figure 3I and I’ for the graphs. [file elife-108292-fig3-data1.xlsx]

## Sheet: Sheet1
WGA Puncta number					WGA Puncta Intensity
WT	Papss2	sage>Papss-PD; Papss2	sage>Papss-PDK193AF593P; Papss2		WT	Papss2	sage>Papss-PD; Papss2	sage>Papss-PDK193AF593P; Papss2
2594	402	3195	413		13528.5	1670.74	1097.72	4704.24
2570	1459	2957	222		13063.6	1612.23	2719.24	1068.44
3865	125	3077	270		9456.87	1695.34	2333.46	1331.56
3053	597	1854	529		7911.7	6991.73	2803.43	7408.09
5377	423	2976	744		12018.3	1914.11	1637.82	1451.42
2603
