# Supplementary material for: Sulfation affects apical extracellular matrix organization during development of the Drosophila embryonic salivary gland tube
Source: eLife. 2025 Sep 23;14:RP108292. doi: 10.7554/eLife.108292 (PMC12456955; doi:10.7554/eLife.108292)
Supplement: Figure 3—source data 2. — See Figure 3L and L’ for the graphs. [file elife-108292-fig3-data2.xlsx]

## Sheet: Sheet1
Control				Papss mutant
	ManII-GFP intensity	WGA intensity			ManII-GFP intensity	WGA intensity
1	54	59		1	36	92
2	71	43		2	34	93
3	84	51		3	33	80
4	96	79		4	39	65
5	109	91		5	60	51
6	113	92		6	57	51
7	101	97		7	52	53
8	90	106		8	51	53
9	92	108		9	64	32
10	97	96		10	63	35
11	94	78		11	50	34
12	83	75		12	44	35
13	75	88		13	37	32
14	71	79		14	36	25
15	78	67		15	36	17
16	89	65		16	33	20
17	85	87		17	26	24
18	79	117		18	30	25
19	96	124		19	37	30
20	114	129		20	31	32
21	113	153		21	27	32
22	110	178		22	26	30
23	118	193		23	24	18
24	132	210		24	24	18
25	130	217		25	22	11
26	152	207		26	20	15
27	172	195		27	21	24
28	186	197		28	22	35
29	189	192		29	23	35
30	186	174		30	28	27
31	189	155		31	30	19
32	188	134		32	31	17
33	166	105		33	39	20
34	138	89		34	42	25
35	113	93		35	45	29
36	85	93		36	47	33
37	66	87		37	43	39
38	54	65		38	53	41
39	60	57		39	57	46
40	74	77		40	44	51
41	73	89		41	42	56
42	62	77		42	43	58
43	79	68		43	40	55
44	111	74		44	38	54
45	124	91		45	30	59
46	133	104		46	30	59
47	148	102		47	26	53
48	145	95		48	28	45
49	129	73		49	36	41
50	130	84		50	40	44
51	154	112		51	43	46
52	193	142		52	37	42
53	216	172		53	33	38
54	207	198		54	41	37
55	185	210		55	51	36
56	169	205		56	50	35
57	166	191		57	48	32
58	174	176		58	60	36
59	186	170		59	62	31
60	193	174		60	61	29
61	219	189		61	65	27
62	209	168		62	71	30
63	192	152		63	82	41
64	179	153		64	86	54
65	175	154		65	78	61
66	179	141		66	78	65
67	171	133		67	80	66
68	150	139		68	79	55
69	132	146		69	79	55
70	124	141		70	73	56
71	126	112		71	69	50
72	122	85		72	61	44
73	106	96		73	74	47
74	85	98		74	81	48
75	69	94		75	79	47
76	76	83		76	62	59
77	89	71		77	64	58
78	84	63		78	62	54
79	63	58		79	43	46
80	43	52		80	34	38
81	41	40		81	25	37
82	57	28		82	22	43
83	70	28		83	42	49
84	73	44		84	54	47
				85	46	42
				86	32	32
				87	31	34
				88	32	32
				89	34	30
				90	37	27
				91	37	27
				92	37	33
				93	27	38
				94	22	44
				95	18	44
				96	16	43
				97	15	28
				98	14	35
				99	19	41
				100	30	35
				101	32	35
				102	31	37
				103	32	41
				104	50	35
				105	32	43
				106	19	50
				107	24	59
				108	32	51
				109	41	43
				110	43	46
				111	48	49
				112	48	49
				113	48	49
				114	69	38
				115	82	30
				116	94	35
				117	96	43
				118	79	42
				119	72	53
				120	81	74
				121	80	78
				122	81	72
				123	85	56
				124	88	48
				125	73	69
				126	74	64
				127	79	50
				128	82	43
				129	85	46
				130	82	43
				131	76	39
				132	58	38
				133	59	41
				134	70	44
				135	79	53
