# Supplementary material for: Sulfation affects apical extracellular matrix organization during development of the Drosophila embryonic salivary gland tube
Source: eLife. 2025 Sep 23;14:RP108292. doi: 10.7554/eLife.108292 (PMC12456955; doi:10.7554/eLife.108292)
Supplement: Figure 3—source data 3. — See Figure 3S and T, as well as Figure 3—figure supplement 3C and D, for graphs. [file elife-108292-fig3-data3.xlsx]

## Sheet: Sec15
	WT (series #)	Mean gray value intensity	Mean gray value intensity - background
	1	45.74	34.979
	2	52.818	39.2672
	3	64.458	47.7386
	4	62.727	46.6948
	5	62.838	46.476
	6	53.601	41.7988
	7	48.8	39.5232
	Papss (series #)	Mean gray value intensity	Mean gray value intensity - background
	1	40.258	28.211
	2	21.305	12.2138
	3	31.89	20.0678
	6	37.339	24.9674
	7		-7.9888
	8	40.912	33.1342
	9	43.702	34.1632
	4	51.283	40.8494
	Background intensity
	WT (series #)	Cell 1	Cell 2	Cell 3	Cell 4	Cell 5	Avg. Cell1-5
	1	12.566	13.6	10.85	10.265	6.524	10.761
	2	10.487	13.658	12.316	15.119	16.174	13.5508
	3	18.568	18.051	19.734	17.021	10.223	16.7194
	4	14.372	13.902	18.178	17.422	16.287	16.0322
	5	16.978	13.528	13.83	15.019	22.455	16.362
	6	14.136	11.36	10.998	9.811	12.706	11.8022
	7	10.104	8.052	9.578	8.627	10.023	9.2768
	Papss (series #)	Cell 1	Cell 2	Cell 3	Cell 4	Cell 5
	1	8.247	12.108	14.583	9.978	15.319	12.047
	2	8.587	12.116	10.27	7.024	7.459	9.0912
	3	12.606	9.622	12.552	11.494	12.837	11.8222
	6	13.714	12.45	11.156	13.906	10.632	12.3716
	7	6.337	6.438	9.436	8.216	9.517	7.9888
	8	8.744	5.22	10.571	9.704	4.65	7.7778
	9	7.472	9.732	9.11	10.322	11.058	9.5388
	4	14.041	11.922	9.281	8.055	8.869	10.4336

## Sheet: Rab11
	WT (series #)	Mean gray value intensity	Mean gray value intensity - background
	1 aq. 7.8.24	82.124	59.9024
	1	71.223	46.6698
	2	86.428	54.3786
	3	81.911	53.8676
	4	78.205	51.1982
	5	94.642	64.7492
	Papss (series #)	Mean gray value intensity	Mean gray value intensity - background
	4	93.375	72.0794
	5	97.264	77.5458
	6	94.768	66.2896
	7	109.907	85.9064
	9	76.156	54.6706
	2	81.031	68.904
	1	70.146	54.8738
	10	76.539	54.7978
	Background intensity
	WT (series #)	Cell 1	Cell 2	Cell 3	Cell 4	Cell 5	Avg. Cell1-5
	1 aq. 7.8.24	22.741	24.347	24.042	16.923	23.055	22.2216
	1	36.105	22.222	21.419	26.131	16.889	24.5532
	2	36.799	45.674	22.848	22.404	32.522	32.0494
	3	36.355	21.207	28.333	24.797	29.525	28.0434
	4	28.177	27.612	28.839	32.901	17.505	27.0068
	5	35.966	31.422	27.213	28.124	26.739	29.8928
	Papss (series #)	Cell 1	Cell 2	Cell 3	Cell 4	Cell 5	Avg. Cell1-5
	4	23.708	21.301	21.519	18.686	21.264	21.2956
	5	25.969	17.345	20.803	17.826	16.648	19.7182
	6	32.841	24.447	34.454	22.768	27.882	28.4784
	7	29.553	28.408	22.491	19.616	19.935	24.0006
	9	26.067	24.495	18.089	16.893	21.883	21.4854
	2	10.511	13.983	13.221	12.903	10.017	12.127
	1	11.176	16.194	17.083	14.531	17.377	15.2722
	10	22.485	22.26	21.985	21.412	20.564	21.7412

## Sheet: Rab7
		m.g.v mean gray value intensity
	WT	Individual punctate measurments Series #
		m.g.v	area
	10.23.23	1a	1a	1b		1c		1d		1e		2a		2b		2c		2d		2e		3a		3b		3c		3d		3e		5a		5b		5c		5d		5e		6a		6b		6c		6d
Punctate count	1	63.515	0.138	67.309	0.789	69.469	0.751	59.943	0.147	60.035	0.361	80.233	0.738	56.714	0.176	59.208	0.323	63.713	0.7	71.726	0.306	63.675	0.671	66.656	0.256	82.085	0.491	59.506	0.34	61.688	0.134	60.762	0.545	63.376	0.713	76.257	0.948	74.062	0.948	61.266	0.268	65.9	0.294	59.526	0.398	68.453	0.398	64.404	0.675
	2	62.57	0.625	57.974	0.159	65.494	0.348	60.64	0.21	66.577	0.843	59.846	0.164	66.351	0.323	62.04	0.21	70.143	0.793	56.684	0.239	57.028	0.151	72.015	0.549	59.852	0.113	62.038	0.109	59.968	0.13	65.829	0.147	59.969	0.134	69.829	0.91	64.716	0.31	59.839	0.13	64.426	0.591	66.36	0.105	86.411	1.489	63.388	0.487
	3	63.717	0.386	61.062	0.201	69.745	0.214	73.938	1.145	61.838	0.44	81.75	0.218	63	0.105	59.4	0.147	55.759	0.122	56.476	0.176	57.4	0.294	72.591	0.554	57.9	0.168	55.119	0.176	56.059	0.143	55.833	0.126	59.483	0.122	58.862	0.122	57.923	0.218	59.13	0.323	62.906	0.403	58.577	0.109	57.3	0.294	60	0.138
	4	58.971	0.44	62.922	0.214	57.234	0.197	57.192	0.109	66.7	0.252	101.384	0.96	66.224	0.524	55.577	0.109	72.355	0.826	81.899	0.994	88.306	0.755	90.639	0.348	62.125	0.101	62.25	0.218	63.849	0.721	54.807	0.239	62.413	0.193	56.78	0.344	61.175	0.239	57.524	0.176	63.034	0.122	66.054	0.235	82.777	0.47	59.38	0.508
	5	78.381	0.474	58.027	0.155	65.896	0.281	59.5	0.101	64.426	0.285	76.496	0.482	67.127	0.793	59.8	0.105	67.521	0.902	62.29	0.13	60.947	0.315	60.648	0.226	59.222	0.113	73.479	0.612	67.486	0.302	62.004	1.028	56.6	0.147	55.973	0.155	58.389	0.151	81.523	1.3	60.865	0.373	66.367	0.126	55.039	0.323	64.956	0.759
	6	66.684	0.65	61.942	0.432	66.016	0.784	76.09	0.466	59	0.105	59.121	0.138	64.009	0.898	60.152	0.277	60.59	0.256	63.647	0.143	57.033	0.126	60.453	0.222	65.24	0.105	75.977	0.369	73.045	0.281	66.112	0.487	67.385	0.218	58.458	0.101	59.05	0.168	78.738	1.569	58.771	0.147	61.959	0.206	68.664	1.275	62.352	0.226
	7	58.296	0.113	56.229	0.201	57.095	0.176	62.731	0.499	64.321	0.327	74.704	1.019			57.106	0.197	57.921	0.159	62.405	0.176	59.569	0.243	56.929	0.176	61.88	0.105			60.19	0.264	86.127	2.416	58.484	0.268	56.75	0.252	69.667	0.239	71.395	0.659	56.7	0.21	59.811	0.398	60.91	0.654	60.719	0.134
	8	82.043	0.591	71.53	0.759	58.491	0.906	88.735	0.776	60.068	0.247	67.047	0.361			70.661	0.482	69.176	0.453	55.812	0.134	61.528	0.151	60.833	0.201	57.207	0.122			71.627	0.461	85.43	1.2	81.601	1.061	57.194	0.13	56.137	0.214	68.07	0.893	57.653	0.302	63.926	0.285	56.314	0.294	61.283	0.445
	9	71.605	0.998	58.506	0.331	66	0.298	64.453	0.268	60.972	0.151	61.333	0.113			66.235	0.751	74.489	0.189	97.864	1.111	65.432	0.524	61.422	0.617	67.966	0.247			55.5	0.109	68.419	1.011	83.546	1.967	65.668	1.808	63.176	0.428	70.39	0.247	85.08	2.106	65.314	0.147	60.008	0.52	58.939	0.415
	10	56.643	0.117	69.149	0.365	60.218	0.231	56.25	0.151	61.075	0.336	75.806	0.26			80.726	0.445			71.932	0.621	64.431	0.457	70.975	0.331	57.64	0.105			66.338	0.273	61.219	0.306	59.75	0.101	67.019	0.445	62.714	0.294	54.964	0.117	64.316	0.717	69.61	0.323	61.579	0.319	58.574	0.256
	11	53.4	0.084	63.699	0.306	72.373	0.214	62.533	0.252	59.852	0.113	95.335	1.313							62.4	0.105	71.55	0.885	57.256	0.164	68.366	0.172			58.13	0.193	65.537	0.226	69.619	0.352	65.664	0.499	72.008	1.065	54.375	0.101	58.296	0.113	96.176	0.499	58.114	0.185	57.385	0.109
	12	70.167	0.579	66.777	0.508			58.708	0.273	56.973	0.155	56.167	0.101							60.245	0.222			70.879	0.277	99.342	0.491			63.966	0.243	82.864	0.524	62.804	0.386	58.692	0.109	103.367	0.411	58.593	0.113	59.93	0.18	60.785	0.331	61.234	0.323	58.348	0.277
	13	64.073	0.172	77.779	0.398			63.676	0.738	55.735	0.143	54.84	0.105											56.7	0.126	61.265	0.348			63.205	0.185	67.972	1.061	68.573	2.525	57.375	0.134	79.317	0.596	84.647	0.499	60.068	0.185	73.065	1.095	57.138	0.122	58.35	0.168
	14	69.184	0.432	62.806	0.13			59.386	0.185	69.764	1.082	64.526	0.487											61.125	0.201	77.228	0.755			75.745	0.575	65.169	0.843	75.73	1.644	66.599	1.078	66.982	0.235	81.684	0.784	56.429	0.176	63	0.168	57.63	0.113	74.841	0.369
	15	58.536	0.117	58.593	0.226			64.112	0.373	57.96	0.105	67.734	0.868											65.821	0.235	74.566	0.83			57.853	0.143			113.068	3.255	86.721	1.292	123.669	0.596	78.136	0.801	56.22	0.172	64.449	0.327	70.911	1.611	63.12	0.315
	16	77.886	0.554	57.737	0.415			57.333	0.113	59	0.109	63.088	0.143											57.549	0.474	59.652	0.952			58.724	0.122			92.56	1.409	60.397	0.264	105.482	0.478	59.057	0.516	61.827	0.218	55.821	0.235	58.075	0.168	59.394	0.138
	17	62.127	0.298	58.742	0.13			57.545	0.185	57.097	0.13	58.613	0.26											62.889	0.642	66.447	0.357			59.532	0.394			67.143	0.294			62.967	0.256	61.04	0.105	75.461	0.373	63.114	0.843	63.96	0.315	57.815	0.226
	18	58.455	0.138	56.618	0.143			58.75	0.101	59.533	0.315	61.029	0.143											61.483	0.122	56.951	0.172			66.939	0.344			61.423	0.218			69.75	0.252	61.683	0.172	62	0.239	58.484	0.13	56	0.105	62.891	0.499
	19	65.902	0.172	59.966	0.625			56.735	0.143	68.253	0.78	98.287	1.405													61.735	0.143			74.032	0.931			57.768	0.235			60.816	0.159	58.613	0.13	58.444	0.226	101.608	1.552	64.25	0.369	60.022	0.193
	20	57.415	0.172	59.262	0.273			59.407	0.113			60.691	0.231													67.55	0.503			60.622	0.31			61.606	0.394			59.367	0.126	62.542	0.201	60.254	0.281	57.69	0.176	59.667	0.302	71.468	0.851
	21	59.49	0.83	56.857	0.147			63.455	0.231			75.981	1.107													81.862	0.914							58.479	0.298			60.821	0.562			57	0.122	61.455	0.323	61.16	0.21	56.606	0.277
	22	58.179	0.117	61.774	0.13			62.685	0.612																	60.634	0.172							86.272	1.124			62.167	0.453			76.767	1.762	85.986	1.221	63.338	0.818	62.044	0.285
	23			57.735	0.143																					61.1	0.21											65.817	0.344			68.004	1.128	94.792	1.33			62.245	1.732
	24			74.144	1.401																					86.073	0.231											72.156	0.566									70.519	0.115
	25			62.393	0.491																					66.434	0.57											61.661	0.235									59.167	0.226
	26			58.243	0.432																																	68.07	0.843									54.152	0.138
	27			60.24	0.105																																	61.436	0.424									63.36	0.21
	28			61.016	0.26																																	61.4	0.189									65.542	0.348
	29			58.014	0.302																																	59.971	0.143									58.412	0.143
	30			57.462	0.164																																	67.277	0.545									66.566	1.69
	31			60.838	0.285																																	61.113	0.222									68.153	0.357
	32																																					60.571	0.206
	33																																					78.14	0.927
	34																																					80.619	0.65
	35																																					71.284	0.679
	36																																					78.05	1.342
	37																																					77.23	0.621
	38																																					69.667	0.516
	39																																					65.427	0.659
	40																																					72.95	0.503
	41																																					91.266	1.418
	42																																					56.771	0.147
	43
	44
	Average punctate intensity (per sample)	62.7961										67.2998										65.2119										67.9981										64.4824
	Average punctate intensity (per cell)	64.42		61.7853		64.3665		62.8999		61.5357		71.1434		63.9042		63.0905		65.7408		66.9483		64.2635		64.8257		67.2129		64.7282		63.7249		67.7203		69.4387		63.6399		69.8714		66.1604		63.0587		68.4317		63.1333		62.0773
	Average mean gray value per sample, calculated using cell average	63.0015										66.1654										64.951										67.3661										64.6562
	Per sample-background intensity	44.839										48.9944										48.1661										48.3939										45.4946
	Per cell average-background intensity	45.0444										47.86										47.9052										47.7619										45.6684
	Counts per cell		22		31		11		22		19		21		6		10		9		12		11		18		25		6		20		14		22		16		42		20		23		23		22		31
	Average count for cell, per sample	21										24.2162										16										22.8										24.2
	Count per sample	126										69										94										137										131
	Count IF greater than 0.200 just for WT		12		21		9		12		11		14		4		6		6		6		8		14		13		4		12		12		17		10		35		12		15		16		17		22
	Average per cell for countIF above 0.200	13										7.2										10.2										17.2										18
										Background intensity
										WT (series #)		Cell 1		Cell 2		Cell 3		Cell 4		Cell 5		Average
										1		18.397		19.202		16.58		20.462		15.1445		17.9571
										2		21.771		19.006		12.66		16.671		21.419		18.3054
										3		15.477		14.186		21.562		18.688		15.316		17.0458
										5		18.817		23.779		23.536		18.702		13.187		19.6042
										6		23.064		19.565		14.464		17.555		20.291		18.9878
										7		15.7		13.771		14.035		15.425		14.281		14.6424
										Papss (series #)		Cell 1		Cell 2		Cell 3		Cell 4		Cell 5		Average
										1		13.883		13.146		12.327		14.369		11.123		12.9696
										2		11.688		8.903		13.376		8.633		5.938		9.7076
										3		18.59		21.205		15.695		14.737		16.363		17.318
										4		11.232		11.099		12.274		11.545		10.247		11.2794
										5		12.06		10.592		10.575		13.017		10.512		11.3512
										6		18.378		12.128		14.884		15.758		12.496		14.7288
										7		11.021		11.446		10.998		12.517		12.228		11.642
										8		12.778		11.539		11.582		10.164		11.311		11.4748
										9		13.817		11.964		10.126		12.926		14.434		12.6534
										Setting Scale		WT		102.65 um
												Papss		102.98 um
Final numbers for graphs
Rab7 mean gray value intensity of puncta				Rab7 average number of puncta
WT (n=6)	Papss (n=9)			WT (n=6)	Papss (n=9)
62.7961	66.0947			21	3
67.2998	62.5201			11.6	3.4
65.2119	63.7229			16	6.8
67.9981	66.8992			22.8	3.4
64.4824	46.0534			24.2	3.4
63.1148	66.8574			12.4	6.8
	65.7851				4.2
	66.6857				2.6
	71.6619				2
[truncated: 99 more columns]
