# Supplementary material for: Sulfation affects apical extracellular matrix organization during development of the Drosophila embryonic salivary gland tube
Source: eLife. 2025 Sep 23;14:RP108292. doi: 10.7554/eLife.108292 (PMC12456955; doi:10.7554/eLife.108292)
Supplement: Figure 3—source data 4. [file elife-108292-fig3-data4.xlsx]

## Sheet: Sheet1
WT							WT	Papss
11-17-22 No.5-1 (003)	cell 1	13					13	2
	cell 2	14					14	6
	cell 3	8					8	8
02-16-23 No.3 (002)	cell 1	10					10	4
	cell 2	12					12	0
	cell 3	10					10	3
05-24-23 No.2 (002)	cell 1	7					7	7
Papss						Avg	10.5714	4.28571
02-16-23 No.1 (005)	cell 1	2				Std	2.57275	2.87021
	cell 2	6
	cell 3	8
02-16-23 No.2 (024)	cell 1	4
	cell 2	0
	cell 3	3
	cell 4	7
