# Supplementary material for: Sulfation affects apical extracellular matrix organization during development of the Drosophila embryonic salivary gland tube
Source: eLife. 2025 Sep 23;14:RP108292. doi: 10.7554/eLife.108292 (PMC12456955; doi:10.7554/eLife.108292)
Supplement: Figure 4—source data 1. [file elife-108292-fig4-data1.xlsx]

## Sheet: Sheet1
Number of acellular regions							Number of SG cells
WT	Papss2	sage>Papss-PD; Papss2	sage>PapssPD K193A F593P; Papss²				WT (n=8)	Papss2 (n=8)	Papss2/BSC445 (n=8)	sage>p35; Papss2 (n=8)	sage>Papss-PE; Papss2 (n=10)	sage> Papss-PD K193AF593P; Papss2 (n=10)
0	4	0	4				153	90	118	128	130	127
0	4	0	4				119	112	102	132	158	89
0	4	2	2				141	119	116	126	135	87
0	0	1	5				152	112	106	132	111	102
0	2	0	3				137	91	92	127	134	106
0	1	1	2				126	120	116	136	131	127
0	4	0	1				147	119	98	133	122	120
0	4	0	2				167	127	111	136	143	120
0	2	0	4								146
0	3	0	4								122
		0
		1
		0
		0
		0
