# Supplementary material for: Sulfation affects apical extracellular matrix organization during development of the Drosophila embryonic salivary gland tube
Source: eLife. 2025 Sep 23;14:RP108292. doi: 10.7554/eLife.108292 (PMC12456955; doi:10.7554/eLife.108292)
Supplement: Figure 6—source data 1. — see Figure 6F for the graph. [file elife-108292-fig6-data1.xlsx]

## Sheet: Sheet1
Number of constrictions
Pio mutant (05/24/24)				Np mutant (10/21/24)
Series No	No of constrictions			Series No	No of constrictions
15	1			3	2
14	2			5	1
11	2			6	1
7	2
5	3				2025-04-30
				Series No	No of constrictions
	2024-09-09			2	1
Series No	No of constrictions			3	1
4	2			4	1
5	2			5	0
